# Supplementary material for: A rare example of nickel(ii) chains based on a heteroscorpionate-like ligand with quadruple imidazolyl interactions
Source: Royal Society of Chemistry journal article supplement (doi:10.1039/c4dt01099j), 2014-01-01
Supplement: c4dt01099j1.pdf [file c4dt01099j1.pdf]

## Supporting Information

# A rare example of nickel(II) chain based on an heteroscorpionate-like ligand with quadruple imidazolyl interactions

Carlos J. Gómez-García,<sup>a\*</sup> Emilio Escrivà<sup>b\*</sup>, Guillermo Mínguez Espallargas,<sup>a</sup> Juan José Borrás-Almenar,<sup>b</sup> Lucwía Soto,<sup>b</sup> Amparo Sancho,<sup>b</sup> Julia García-Lozano,<sup>b</sup> and Carmen Ramírez de Arellano<sup>c</sup>

<sup>a</sup> Instituto de Ciencia Molecular (ICMol), Parque Científico, Universidad de Valencia, C/ Catedrático José Beltrán, 2, 46980 Paterna, Valencia, Spain.

<sup>b</sup> Departament de Química Inorgànica, Universitat de València, c/ Vicent Andrés Estellés, s/n and c/Dr. Moliner, 50, 46100 Burjassot (València) Spain.

<sup>c</sup> Departament de Química Orgànica, Universitat de València, c/ Vicent Andrés Estellés, s/n, 46100 Burjassot (València) Spain.

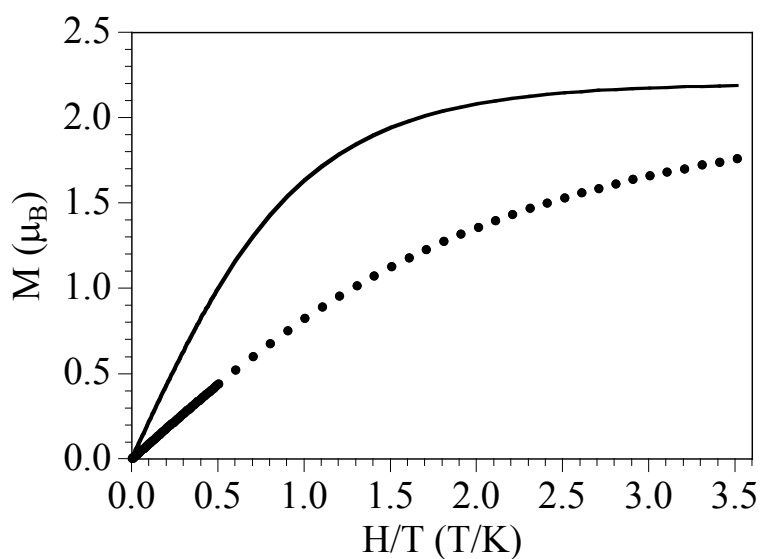

**Figure S1.** Isothermal magnetization for compound **1** at 2 K. Solid line shows the Brillouin function for a  $S = 1$  ions with  $g = 2.2$

## X-Ray powder diffraction studies

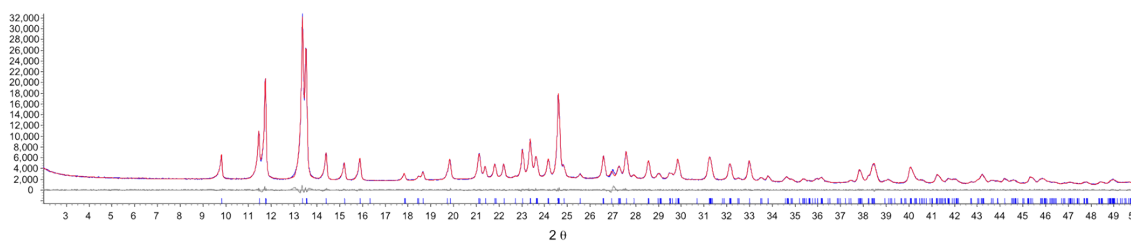

**Figure S2.** Observed (blue) and calculated (red) profiles and difference plot [ $(I_{\text{obs}} - I_{\text{calcd}})$ ] (grey) of the Pawley refinements for compound **1** ( $2\theta$  range 2.0–50.0 °)

**Table S1.** Crystallographic data for compound **1**.

| Compound                                        | <b>1</b>                                           |
|-------------------------------------------------|----------------------------------------------------|
| Empirical formula                               | $\text{C}_{10}\text{H}_{18}\text{N}_4\text{NiO}_9$ |
| Formula weight                                  | 396.99                                             |
| Crystal colour                                  | light blue                                         |
| Crystal size ( $\text{mm}^3$ )                  | $0.20 \times 0.16 \times 0.06$                     |
| Temperature (K)                                 | 120(2)                                             |
| Crystal system, $Z$                             | Triclinic, 4                                       |
| Space group                                     | $P2_1/n$                                           |
| $a$ (Å)                                         | 9.4748(3)                                          |
| $b$ (Å)                                         | 13.1587(3)                                         |
| $c$ (Å)                                         | 12.2363(4)                                         |
| $\alpha$ °                                      | 90                                                 |
| $\beta$ °                                       | 90.169(3)                                          |
| $\gamma$ °                                      | 90                                                 |
| $V$ (Å <sup>3</sup> )                           | 1525.57(8)                                         |
| $\rho_{\text{calc}}$ ( $\text{Mg}/\text{m}^3$ ) | 1.728                                              |
| $\mu(\text{MoK}\alpha)$ ( $\text{mm}^{-1}$ )    | 1.329                                              |
| $\theta$ range (°)                              | 3.13–32.05                                         |
| Reflns collected                                | 30625                                              |
| Independent reflns                              | 5060                                               |
| $(R_{\text{int}})$                              | (0.0329)                                           |
| Reflns used in refinement, $n$                  | 5060                                               |
| L. S. parameters, $p$ / restraints, $r$         | 265/21                                             |
| $R1(F)$ , <sup>[a]</sup> $I > 2\sigma(I)$       | 0.0269                                             |
| $wR2(F^2)$ , <sup>[b]</sup> all data            | 0.0670                                             |
| $S(F^2)$ , <sup>[c]</sup> all data              | 1.055                                              |

[a]  $R1(F) = \Sigma(|F_o| - |F_c|) / \Sigma|F_o|$ ;

[b]  $\omega R2(F^2) = [\Sigma\omega(F_o^2 - F_c^2)^2 / \Sigma\omega F_o^4]^{1/2}$ ;

[c]  $S(F^2) = [\Sigma\omega(F_o^2 - F_c^2)^2 / \Sigma(n + r - p)]^{1/2}$

**Table S2.** Hydrogen bond parameters (in Å and °) in compound **1**

| <b>D-H...A</b>              | <b>D-H</b> | <b>H...A</b> | <b>D...A</b> | <b>&lt;(DHA) (°)</b> |
|-----------------------------|------------|--------------|--------------|----------------------|
| N11-H11...O8 <sup>\$1</sup> | 0.88       | 1.98         | 2.8414(14)   | 166.2                |
| N21-H21...O2                | 0.88       | 2.56         | 3.0666(14)   | 117.7                |
| N21-H21...O7 <sup>\$2</sup> | 0.88       | 2.22         | 2.8830(14)   | 131.9                |
| O5-H51...O9 <sup>\$3</sup>  | 0.827(14)  | 2.311(17)    | 3.0493(15)   | 149(2)               |
| O5-H52...O9 <sup>\$4</sup>  | 0.831(14)  | 1.998(14)    | 2.8276(15)   | 177(2)               |
| O6-H61...O1 <sup>\$5</sup>  | 0.820(13)  | 1.791(13)    | 2.6067(13)   | 173(2)               |
| O6-H62...O8 <sup>\$6</sup>  | 0.811(14)  | 1.963(14)    | 2.7713(14)   | 175(2)               |
| O7-H71...O4                 | 0.825(14)  | 1.788(14)    | 2.5862(14)   | 162(2)               |
| O7-H72...O2 <sup>\$5</sup>  | 0.825(14)  | 1.948(14)    | 2.7675(13)   | 172(2)               |
| O8-H81...O1                 | 0.810(15)  | 1.874(15)    | 2.6806(13)   | 174(2)               |
| O8-H82...O9 <sup>\$3</sup>  | 0.804(15)  | 2.052(15)    | 2.8528(15)   | 174(2)               |
| O9-H92...O4                 | 0.843(16)  | 1.850(17)    | 2.6765(15)   | 166(2)               |
| O9-H91...O2 <sup>\$2</sup>  | 0.831(16)  | 2.020(16)    | 2.8326(14)   | 166(2)               |

\$1 = -x+1/2, y-1/2, -z+1/2; \$2 = -x+1, -y, -z+1; \$3 = x-1/2, -y+1/2, z-1/2; \$4 = -x+3/2, y+1/2, -z+3/2; \$5 = x+1, y, z; \$6 = -x+1, -y+1, -z+1.
